# Supplementary material for: Royal Jelly Attenuates LPS-Induced Inflammation in BV-2 Microglial Cells through Modulating NF-κB and p38/JNK Signaling Pathways
Source: Hindawi journal article supplement (doi:10.1155/2018/7834381), 2018-01-01
Supplement: f1 [file 7834381.f1.pdf]

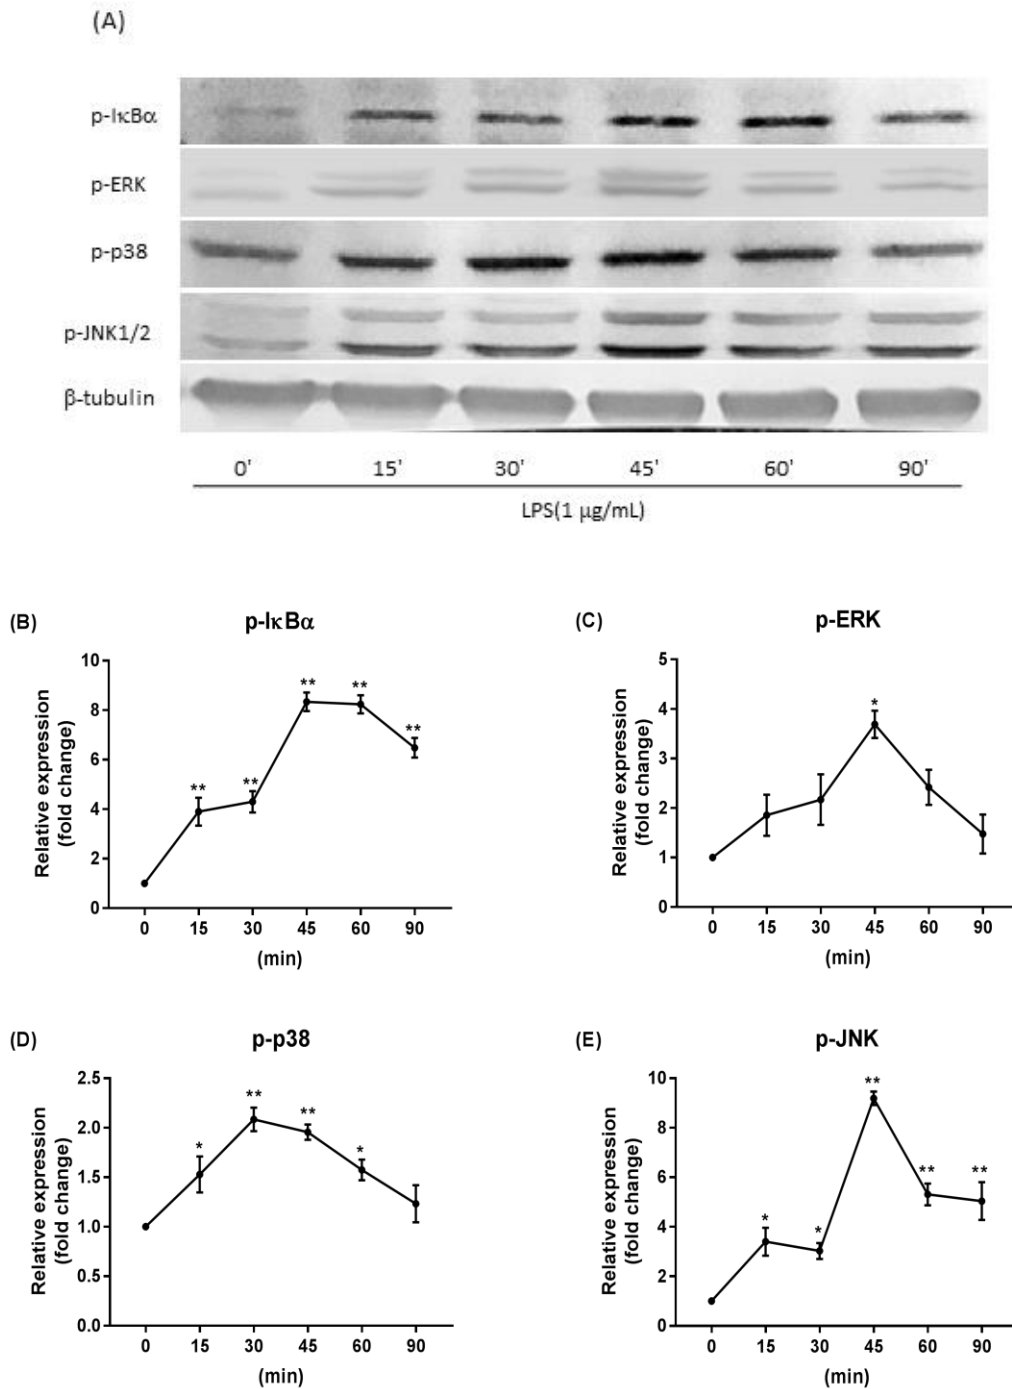

**FIGURE 1:** Effects of RJ on the phosphorylation levels of IκBα, ERK, p38 and JNK in LPS-stimulated BV-2 cells at different time points (A-E). Data are presented as means ± SEM, and group differences were analyzed by one-way ANOVA with *post hoc* Tukey's test. #P<0.05 compared with untreated control group; \*P<0.05, \*\*P<0.01 compared with the group treated with LPS alone.

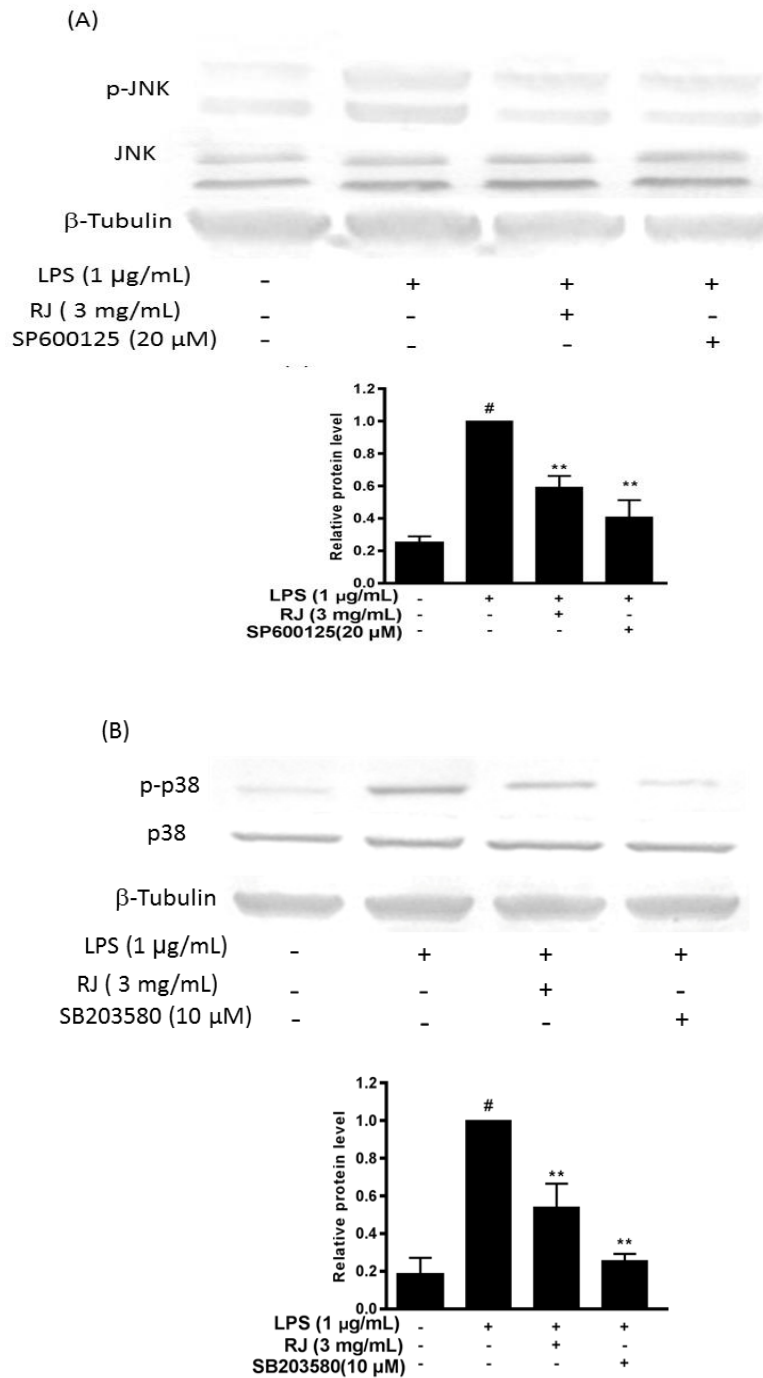

**FIGURE 2:** Effects of JNK inhibitor (SP600125) and p38 inhibitor (SB203580) on the phosphorylation of JNK and p38 in LPS-stimulated BV-2 cells. BV-2 cells were pretreated with or without RJ (3 mg/mL), SP600125 (20  $\mu\text{M}$ ) or SB203580 (10  $\mu\text{M}$ ) for 1 h, respectively, then treated with or without LPS for 45 min. The phosphorylated levels of JNK (A) and p38 (B) were detected by Western blot analysis.  $\beta$ -tubulin protein was used as an internal control. Data are presented as means  $\pm$  SEM, and group differences were analyzed by one-way ANOVA with *post hoc* Tukey's test. # $P < 0.05$  compared with untreated control group; \* $P < 0.05$ , \*\* $P < 0.01$  compared with the group treated with LPS alone.
